# Supplementary material for: On the Three-Finger Protein Domain Fold and CD59-Like Proteins in Schistosoma mansoni
Source: PubMed Central journal article supplement (PMC3812095; doi:10.1371/journal.pntd.0002482), 2013-10-24
Supplement: pntd.0002482.s006.pdf [file pntd.0002482.s006.pdf]

Table S2. List of organisms, abbreviations for gene names and accession numbers used in this study.

| Organism                        | Abbreviation<br>gene name | Accession number                |
|---------------------------------|---------------------------|---------------------------------|
| <i>Schistosoma mansoni</i>      | SmCD59.1                  | Smp_019350                      |
|                                 | SmCD59.2                  | Smp_105220                      |
|                                 | SmCD59.3                  | Smp_081900.2                    |
|                                 | SmCD59.4                  | Smp_166340                      |
|                                 | SmCD59.5                  | Smp_081920                      |
|                                 | SmCD59.6                  | Smp_166350                      |
|                                 | SmCD59.7                  | Smp_125250                      |
| <i>Schistosoma japonicum</i>    | Sj1                       | AAW26563.1                      |
|                                 | Sj2.1                     | AAW27735.1                      |
|                                 | Sj2.2                     | CAX74555.1                      |
|                                 | Sj2.3                     | CAX70150.1                      |
|                                 | Sj3                       | AAW26917.1                      |
|                                 | Sj4.1                     | CAX69649.1                      |
|                                 | Sj4.2                     | CAX74000.1                      |
|                                 | Sj4.3                     | CAX69837.1                      |
|                                 | Sj6                       | CAX69697.1                      |
| <i>Schistosoma hematobium</i>   | Sh1                       | Sha_106826 <sup>*</sup>         |
|                                 | Sh2                       | Sha_200489 <sup>*</sup>         |
|                                 | Sh3                       | Sha_200766 <sup>*</sup>         |
|                                 | Sh5                       | Sha_300533 <sup>*</sup>         |
|                                 | Sh6                       | Sha_109174 <sup>*</sup>         |
|                                 | Sh7                       | Sha_109175 <sup>*</sup>         |
|                                 |                           |                                 |
| <i>Clonorchis sinensis</i>      | Cs-757                    | GAA51655.1                      |
|                                 | Cs-8328                   | Cs_8328 <sup>**</sup>           |
|                                 | Cs-8627                   | Cs_8627 <sup>**</sup>           |
|                                 | Cs-110927                 | GAA56456.1                      |
| <i>Opisthorchis viverrini</i>   | Ov-3995                   | OV1_c3995 <sup>**</sup>         |
|                                 | Ov-6738                   | Ov_Contig6738 <sup>**</sup>     |
|                                 | OV-8524                   | OV1_c8524 <sup>**</sup>         |
|                                 | Ov-31372                  | OV1_c31372 <sup>**</sup>        |
| <i>Fasciola hepatica</i>        | Fh-6273                   | Fh_Contig6273 <sup>**</sup>     |
| <i>Fasciola gigantica</i>       | Fg-15245                  | Contig15245 <sup>**</sup>       |
|                                 | Fg-20490                  | Contig20490 <sup>**</sup>       |
|                                 | Fg-25430                  | Contig25430 <sup>**</sup>       |
| <i>Schmidtea mediterranea</i>   | Smed                      | mk4.006032.00.01 <sup>***</sup> |
| <i>Equus caballus</i>           | Ec-Ly6                    | XP_001496782.1                  |
| <i>Pan troglodytes</i>          | Pa-Ly6                    | XP_002819547.1                  |
| <i>Macaca mulatta</i>           | Mam-Ly6                   | NP_001028116.1                  |
| <i>Mus musculus</i>             | Mm-Ly6                    | NP_035968.1                     |
| <i>Monodelphis domestica</i>    | Md-Ly6                    | XP_001381791.2                  |
| <i>Ornithorhynchus anatinus</i> | Oa-Ly6                    | XP_001512986.1                  |
| <i>Homo sapiens</i>             | Hs-Ly6                    | DAAH22806.1                     |
| <i>Saimiriine herpesvirus</i>   | Sah-CD59                  | CAA73629.1                      |
| <i>Mus musculus</i>             | Mm-CD59                   | NP_031678.1                     |
| <i>Rattus norvegicus</i>        | Rn-CD59                   | NP_037057.1                     |
| <i>Pongo abelii</i>             | Pa-CD59                   | NP_001126861.1                  |
| <i>Homo sapiens</i>             | Hs-CD59                   | NP_000602.1                     |

Databases: <sup>\*</sup><http://schistodb.net/schisto/>, <sup>\*\*</sup><http://bioinfosecnd.vet.unimelb.edu.au/> and <sup>\*\*\*</sup><http://smedgd.neuro.utah.edu/blast.php>
